# Supplementary material for: Photophysical, G-quadruplex DNA binding and cytotoxic properties of terpyridine complexes with a naphthalimide ligand
Source: Royal Society of Chemistry journal article supplement (doi:10.1039/c6ra01441k), 2016-01-01
Supplement: c6ra01441k1.pdf [file c6ra01441k1.pdf]

Electronic Supplementary Material (ESI) for RSC Advances

This journal is © The Royal Society of Chemistry and the Centre National de la Recherche Scientifique 2016

## Supplementary Materials

### Photophysical, G-quadruplex DNA binding and cytotoxic properties of terpyridine complexes with naphthalimide ligand

Zhize Ou,<sup>\*a</sup> Yimeng Qian,<sup>a</sup> Yunyan Gao,<sup>a</sup> Yunqing Wang,<sup>a</sup> Guoqiang Yang,<sup>b</sup> Yi Li,<sup>c</sup> Kaiyue Jiang<sup>a</sup> and Xin Wang<sup>a</sup>

<sup>a</sup>The Key Laboratory of Space Applied Physics and Chemistry, Ministry of Education, Department of Applied Chemistry, School of Science, Northwestern Polytechnical University, Xi'an, 710072, People's Republic of China. E-mail: ouzhize@nwpu.edu.cn, gaoyunyan@nwpu.edu.cn; Fax: +86 29 88431677; Tel: +86 29 88431677

<sup>b</sup> Key Laboratory of Photochemical Convesion and Optoelectronic Material, Technical Institute of Physics and Chemistry, Chinese Academy of Sciences, Beijing, 100190, People's Republic of China

<sup>c</sup>CAS Key Laboratory of Photochemistry, Institute of Chemistry, Chinese Academy of Sciences, Beijing 100190, People's Republic of China

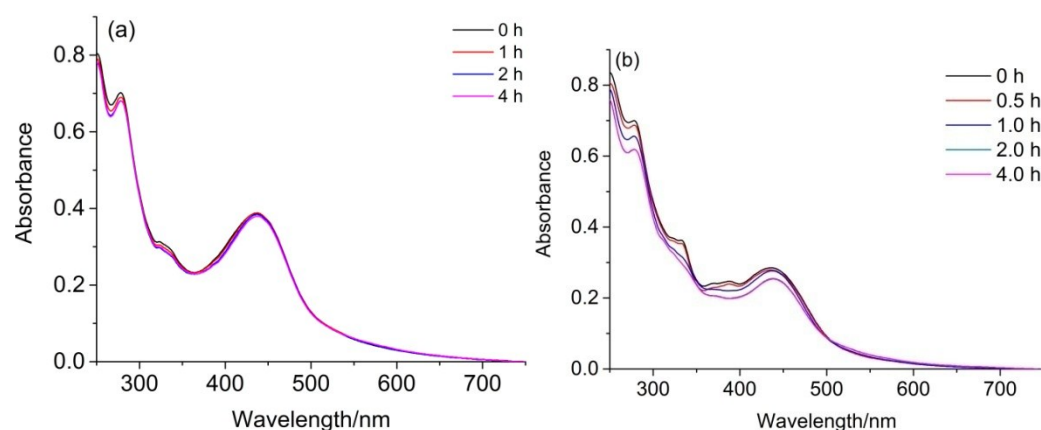

**Fig. S1** UV-Vis absorption spectral changes of **3** (30 μM) in HEPES buffer (10 mM, pH 7.4) incubated in the presence of (a) 0.15 M KCl and (b) 1 mM glutathione.

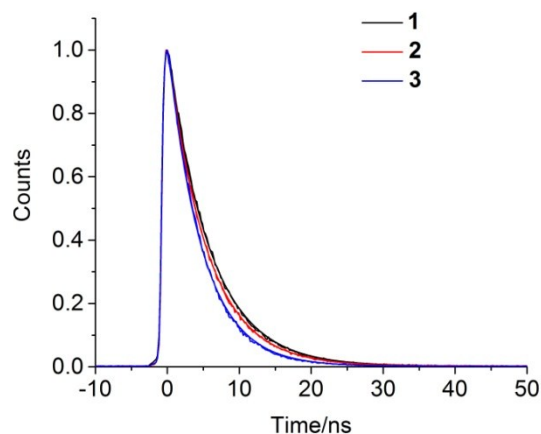

**Fig. S2** Fluorescence decay profiles of **1-3** (4  $\mu$ M) in HEPES buffer solution (10 mM, pH 7.4) containing 0.1 M KCl ( $\lambda_{\text{ex}}$  = 435 nm).

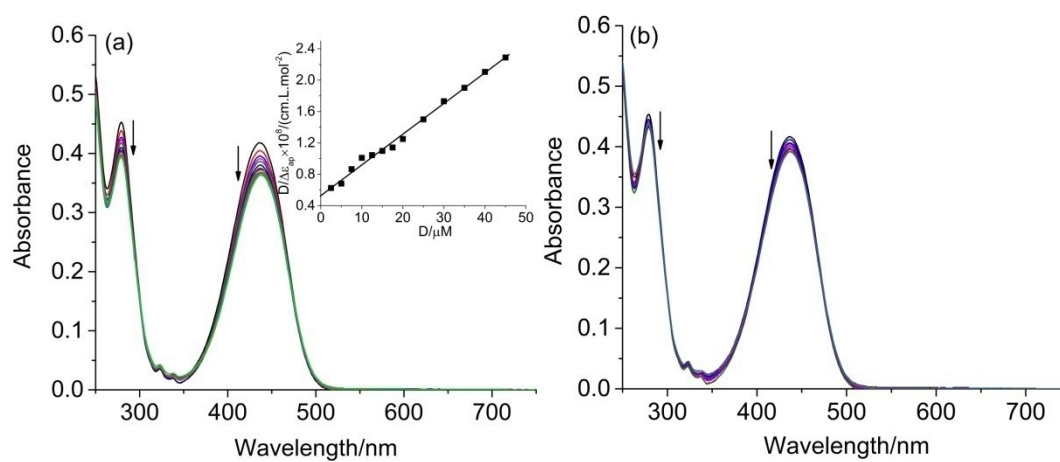

**Fig. S3** UV-Vis titration of **1** (30  $\mu$ M) with (a) CT DNA and (b) Htelo in HEPES (10 mM, pH 7.4) containing 0.1 M NaCl. The arrow indicates the changes upon addition of DNA. Inset: Plot of  $D/\Delta\epsilon_{\text{ap}}$  versus  $D$ .

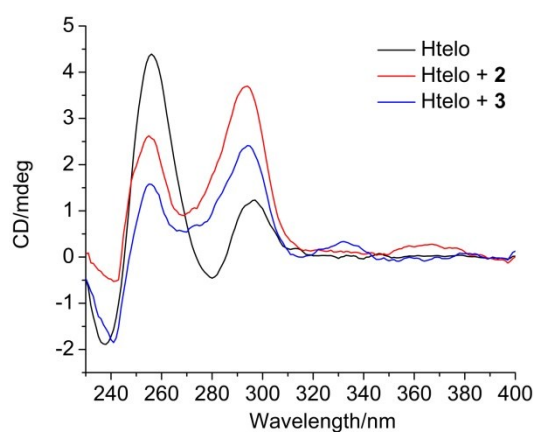

**Fig. S4** CD spectra of Htelo (10  $\mu$ M) in 10 mM Tris-HCl (pH 7.4) in the absence of monovalent cation upon addition of the complexes **2-3** (20  $\mu$ M).

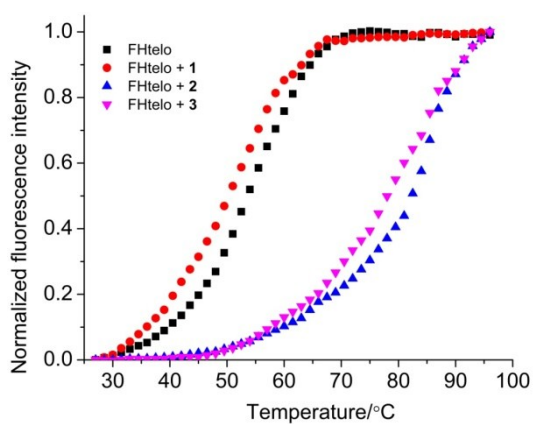

**Fig. S5** FRET melting assay of the labeled FHtelo (0.2  $\mu$ M) in lithium cacodylate buffer (10 mM, pH 7.2), containing KCl (10 mM) and LiCl (90 mM), in the presence of **1-3** (1.0  $\mu$ M).

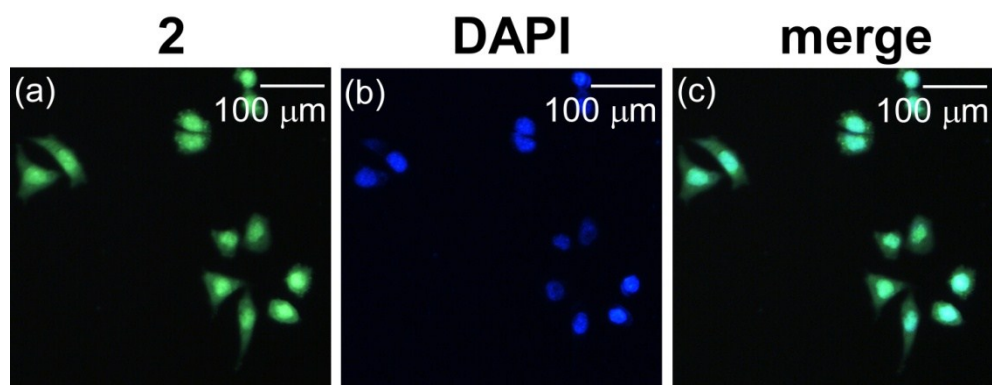

**Fig. S6** Double staining of A549 cells with **2** (5  $\mu\text{M}$ ) and DAPI (5  $\mu\text{M}$ ) at 37  $^{\circ}\text{C}$  for 0.5 h (a-c). Images from left to right: fluorescence image of **2** (laser 488 nm); laser images of DAPI (laser 405 nm); merged image.

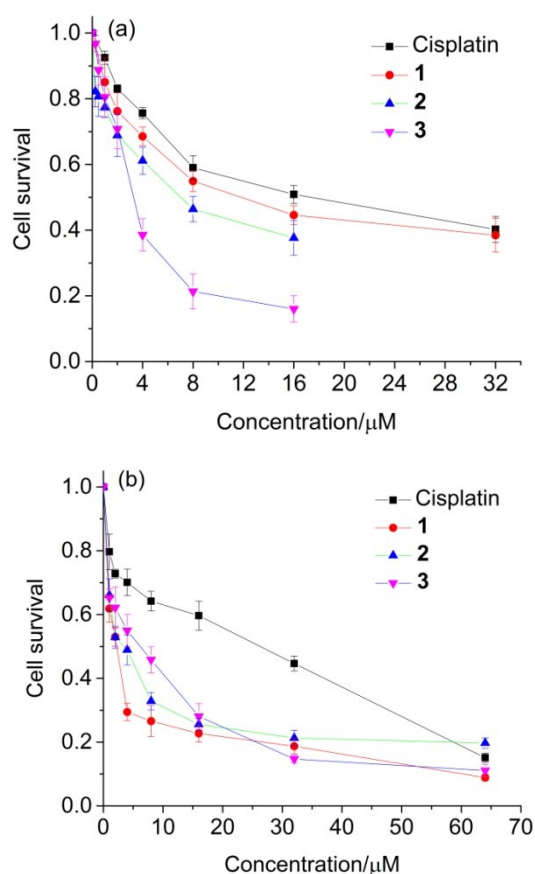

**Fig. S7** The cytotoxic activities of **1**, **2**, **3** and cisplatin against (a) A549 and (b) NIH3T3 cells. The drug treatment period is 48 h.

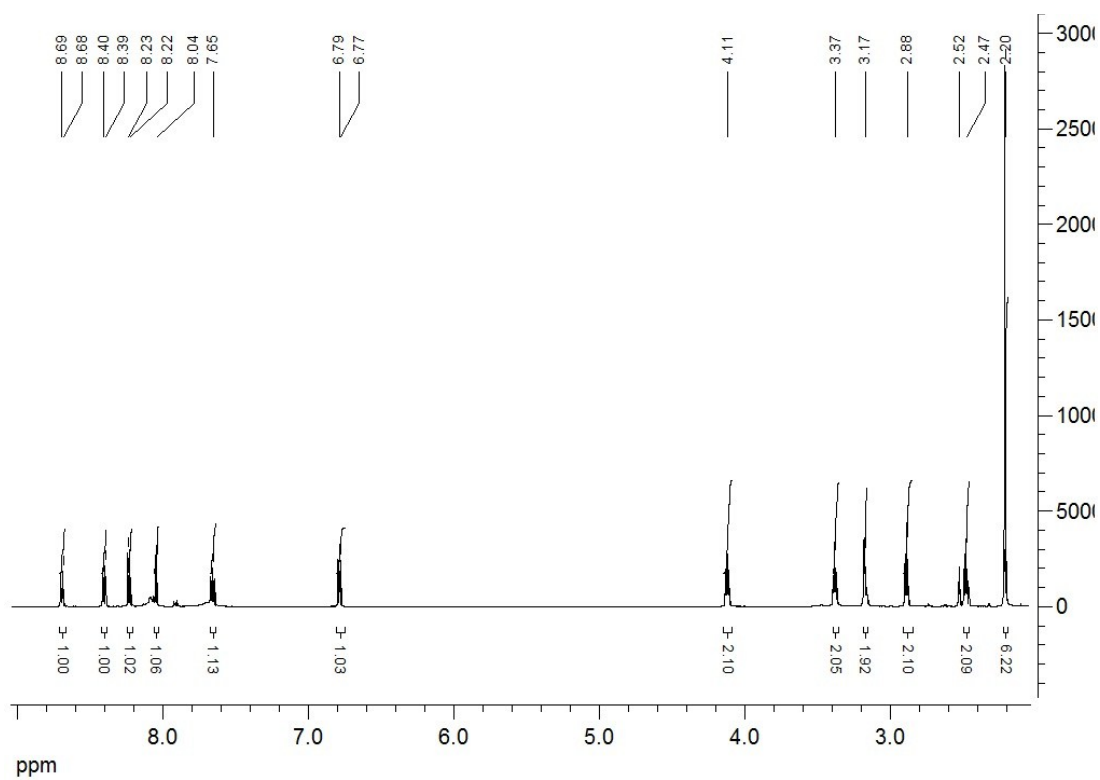

**Fig. S8** <sup>1</sup>H NMR of compound **1** in DMSO-d<sub>6</sub>.

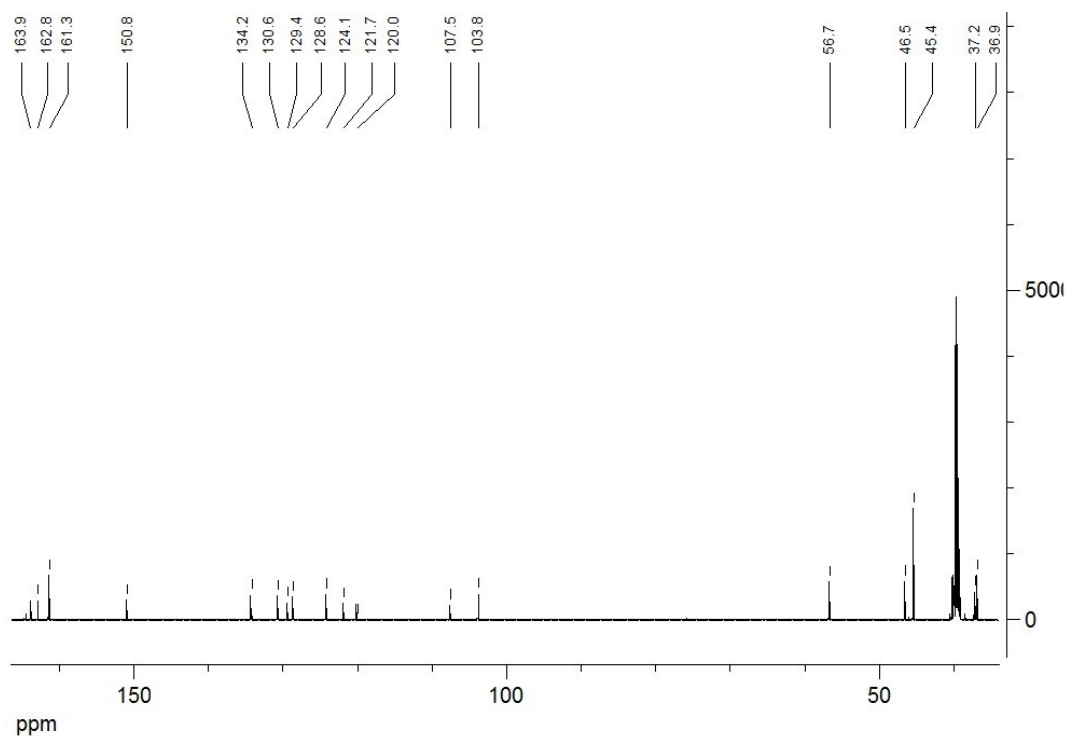

**Fig. S9** <sup>13</sup>C NMR of compound **1** in DMSO-d<sub>6</sub>.

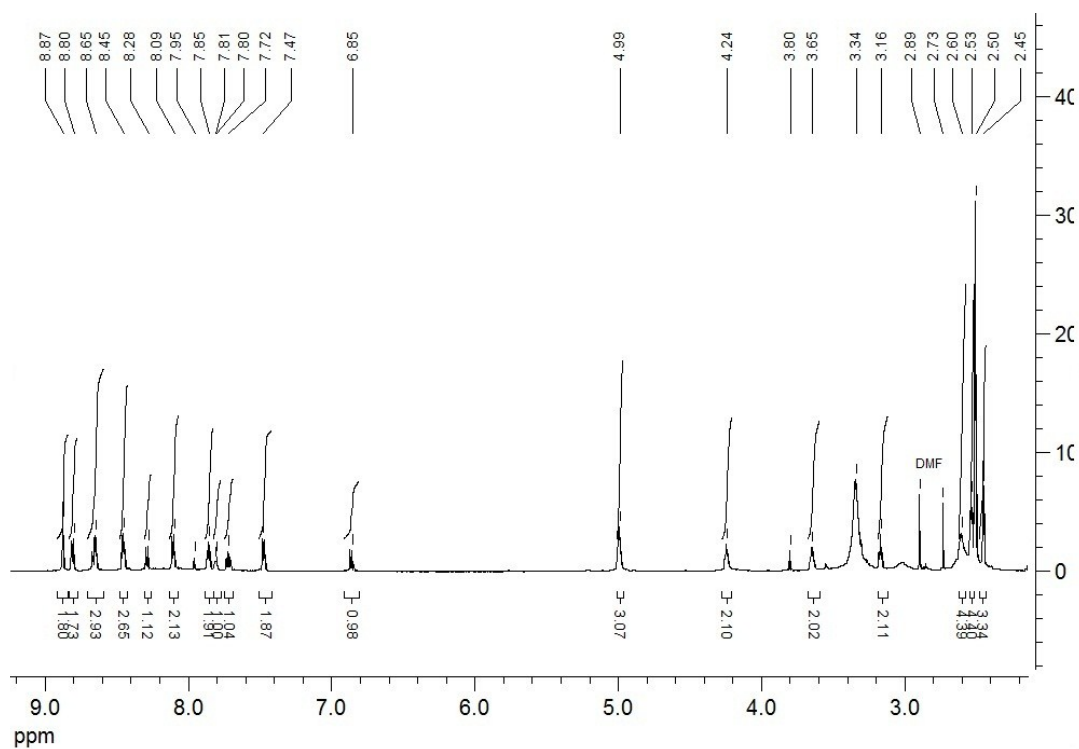

**Fig. S10** <sup>1</sup>H NMR of complex **2** in DMSO-d<sub>6</sub>.

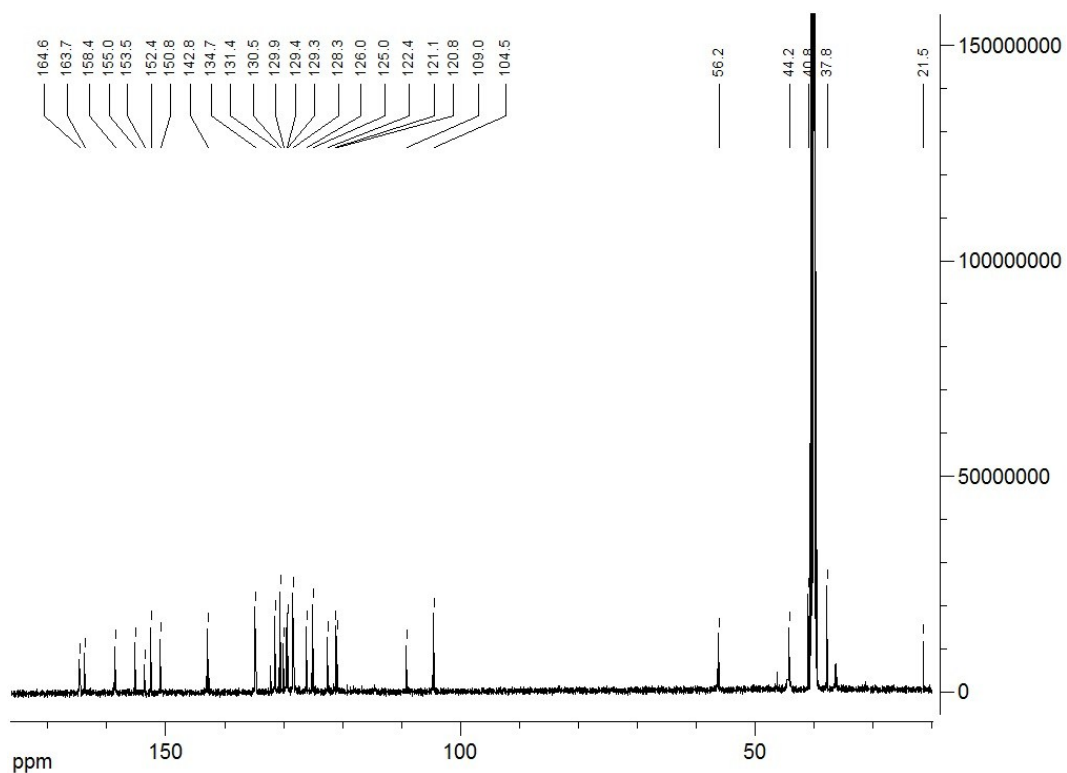

**Fig. S11** <sup>13</sup>C NMR of complex **2** in DMSO-d<sub>6</sub>.

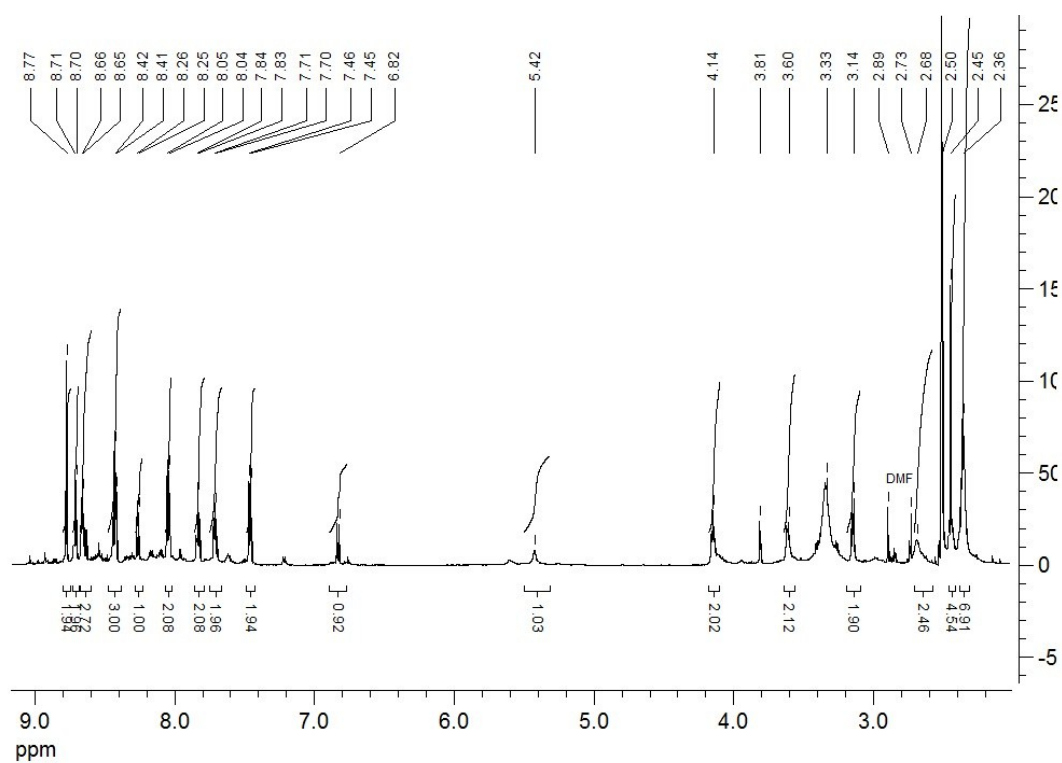

**Fig. S12** <sup>1</sup>H NMR of complex **3** in DMSO-d<sub>6</sub>.

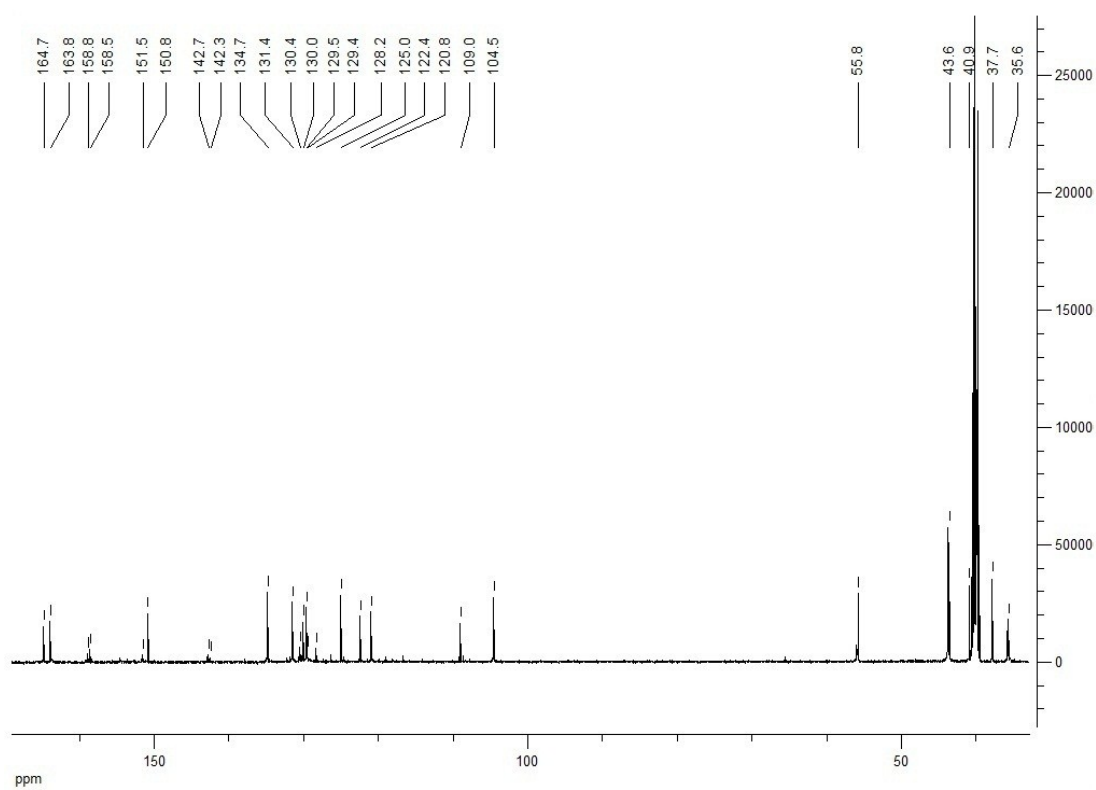

**Fig. S13** <sup>13</sup>C NMR of complex **3** in DMSO-d<sub>6</sub>.
